# Supplementary material for: Surgery for rheumatic heart disease in the Northern Territory, Australia, 1997–2016: what have we gained?
Source: HighWire-hosted journal article supplement (doi:10.1136/bmjgh-2023-011763), 2023-03-01
Supplement: bmjgh-2023-011763supp002_data_supplement.pdf [file bmjgh-2023-011763supp002_data_supplement.pdf]

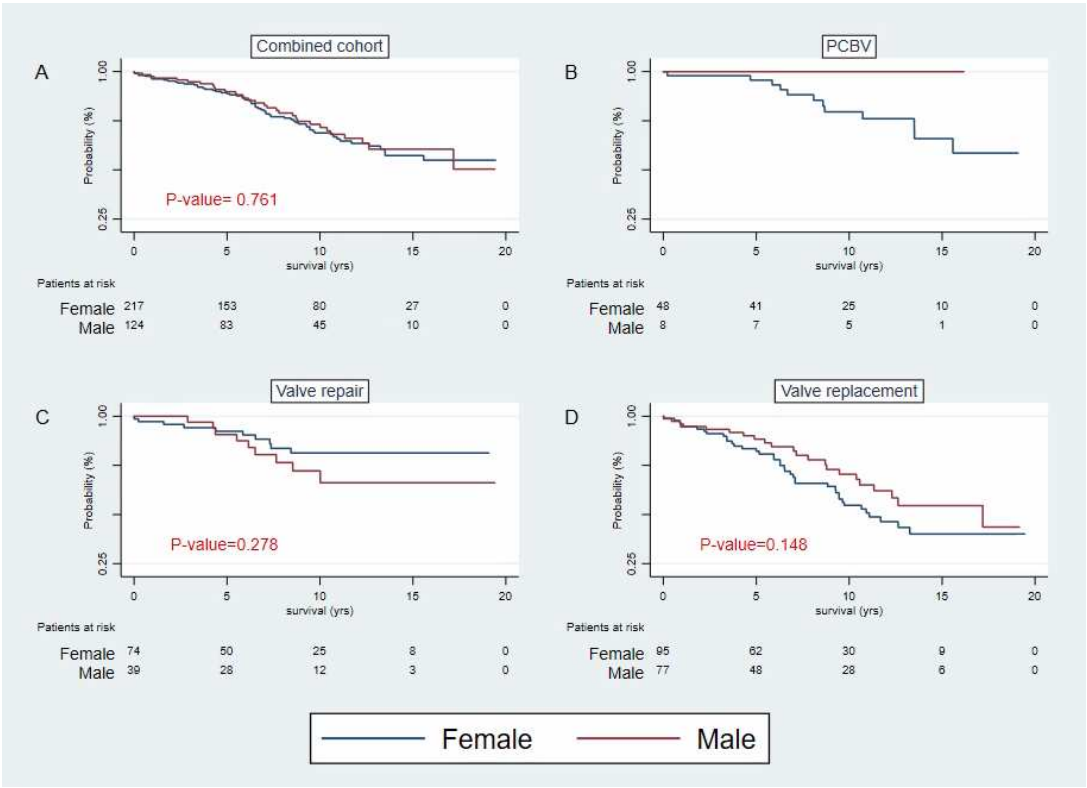

**Supplementary figure 2: Survival curves comparing patients having any mechanical or bioprosthetic valve replacement and those having valve repair or PCBV by sex (binary, defined by health worker).**

One intraoperative death was excluded.

Percutaneous balloon valvuloplasty included 56/342 (16%) procedures; 53 PCMC, 3 PCMC + PCTV.

Valve repair included 113/342 (33%) procedures; 95 MVRep, 2 AVRep, 12 MVRep + AVRep, 3 MVRep + TVRep, 1 MVRep + AVRep + TVRep.

Valve replacement included 173/342 (51%) procedures; 45 bMVR, 41 mMVR, 31 bAVR, 15 mAVR, 23 mMVR+mAVR, 5 bMVR+bAVR, 3 MVRep+bAVR, 1 bMVR+AVRep, 3 bMVR+TVRep, 3 mMVR+TVRep, 1 MVRep+bAVR+TVRep, 1 bMVR+bAVR+TVRep, 1 bMVR+bAVR+bTVR

PCBV; percutaneous balloon valvuloplasty, PCMC; percutaneous balloon mitral commissurotomy, PCTV; percutaneous balloon tricuspid commissurotomy, MVRep; mitral valve repair, AVRep; aortic valve repair, TVRep; tricuspid valve repair, bMVR; bio-prosthetic mitral valve replacement, mMVR; mechanical mitral valve replacement, bAVR; bio-prosthetic aortic valve replacement, mAVR; mechanical aortic valve replacement
