# Supplementary material for: Surgery for rheumatic heart disease in the Northern Territory, Australia, 1997–2016: what have we gained?
Source: HighWire-hosted journal article supplement (doi:10.1136/bmjgh-2023-011763), 2023-03-01
Supplement: bmjgh-2023-011763supp003_data_supplement.pdf [file bmjgh-2023-011763supp003_data_supplement.pdf]

|                                                             | All<br>N=342  | Children <sup>a</sup><br>N=61 | Adults <sup>b</sup><br>N=281 |
|-------------------------------------------------------------|---------------|-------------------------------|------------------------------|
| <b>Comorbidity n (%)</b>                                    |               |                               |                              |
| Chronic kidney disease <sup>c</sup>                         | 18<br>(5.3)   | 0                             | 18<br>(6.4)                  |
| <b>Cardiovascular risk factors</b>                          |               |                               |                              |
| Diabetes                                                    | 43<br>(12.6)  | 1<br>(1.6)                    | 42<br>(14.9)                 |
| Smoking history <sup>d</sup>                                | 172<br>(50.3) | 8<br>(13.1)                   | 164<br>(58.4)                |
| Hypercholesterolemia                                        | 60<br>(19.2)  | 0                             | 60<br>(23.8)                 |
| Hypertension                                                | 82<br>(24.0)  | 0                             | 82<br>(29.2)                 |
| <b>Chronic lung disease</b>                                 |               |                               |                              |
| COPD                                                        | 33<br>(9.6)   | 0                             | 33<br>(11.7)                 |
| Bronchiectasis                                              | 13<br>(3.8)   | 0                             | 13<br>(4.6)                  |
| Obstructive sleep apnoea                                    | 5<br>(1.5)    | 0                             | 5<br>(1.8)                   |
| <b>Cerebrovascular disease</b>                              |               |                               |                              |
| Transient ischemic attack                                   | 5<br>(1.5)    | 0                             | 5<br>(1.8)                   |
| Embolic stroke                                              | 8<br>(2.3)    | 0                             | 8<br>(2.8)                   |
| Haemorrhagic stroke                                         | 7<br>(2.0)    | 0                             | 7<br>(2.5)                   |
| <b>Coronary artery disease</b>                              |               |                               |                              |
| Myocardial infarction                                       | 23<br>(6.7)   | 0                             | 23<br>(8.2)                  |
| moderate or greater stenosis reported on coronary angiogram | 28<br>(8.2)   | 0                             | 28<br>(10.0)                 |
| Three and four vessel coronary artery disease               | 14<br>(4.1)   | 0                             | 14<br>(5.0)                  |

**Supplementary table 1: pre-operative characteristics of patients at the time of first surgery**

COPD: chronic obstructive pulmonary disease

<sup>a</sup> those <16 years at time of first surgery<sup>b</sup> those ≥16 years at time of first surgery<sup>c</sup> estimated glomerular filtration rate < 60ml/min/1.73m<sup>2</sup>.<sup>d</sup> current or previous tobacco smoker.
