# Supplementary figures and images for: Surgery for rheumatic heart disease in the Northern Territory, Australia, 1997–2016: what have we gained?
Source: HighWire-hosted journal article supplement (doi:10.1136/bmjgh-2023-011763), 2023-03-01

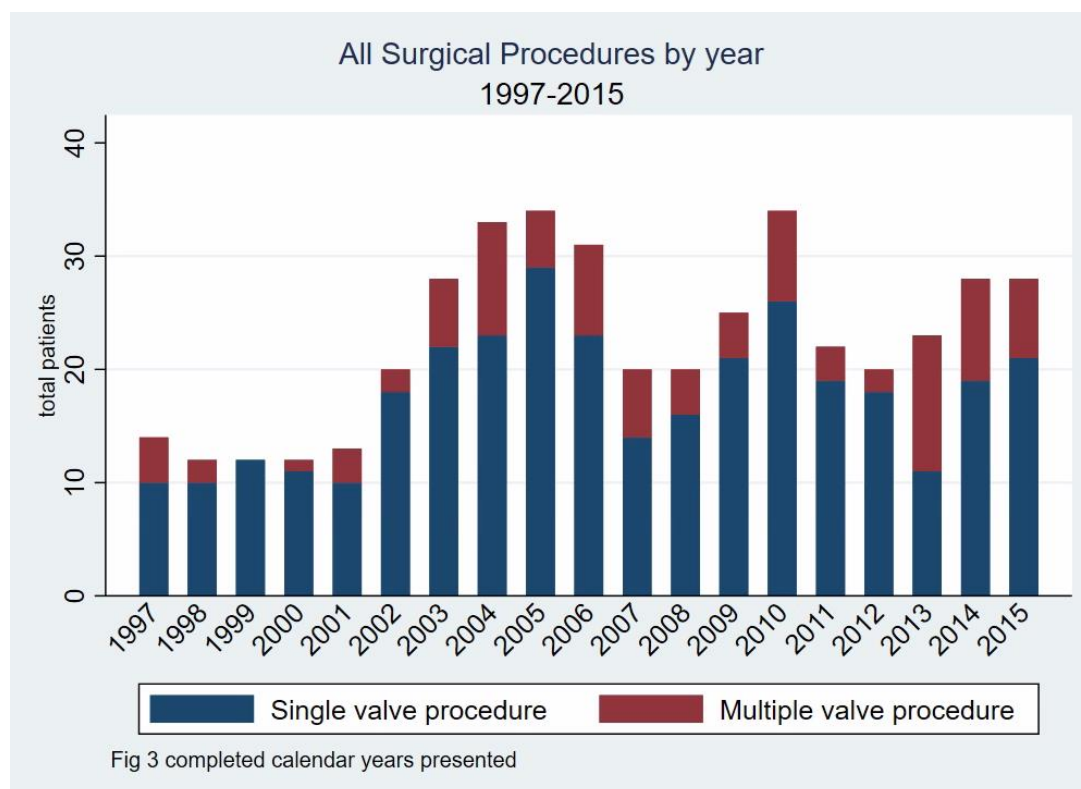

**Supplementary figure 1: Complete calendar years**

Supplement: bmjgh-2023-011763supp001_data_supplement.pdf [file bmjgh-2023-011763supp001_data_supplement.pdf]
